# Supplementary material for: Heterotrophic prokaryote distribution along a 2300 km transect in the North Pacific subtropical gyre during a strong La Niña conditions: relationship between distribution and hydrological conditions
Source: Copernicus journal article supplement (doi:10.5194/bg-12-3607-2015), 2015-06-10
Supplement: Supplementary file 1 [file bg-12-3607-2015-supplement.pdf]

Supplement of Biogeosciences, 12, 3607–3621, 2015  
<http://www.biogeosciences.net/12/3607/2015/>  
doi:10.5194/bg-12-3607-2015-supplement  
© Author(s) 2015. CC Attribution 3.0 License.

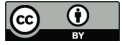

*Supplement of*

**Heterotrophic prokaryote distribution along a 2300 km transect in the North Pacific subtropical gyre during a strong La Niña conditions: relationship between distribution and hydrological conditions**

**M. Girault et al.**

*Correspondence to:* M. Girault ([girault.bmi@gmail.com](mailto:girault.bmi@gmail.com); [gerald.gregori@univ-amu.fr](mailto:gerald.gregori@univ-amu.fr))

The copyright of individual parts of the supplement might differ from the CC-BY 3.0 licence.

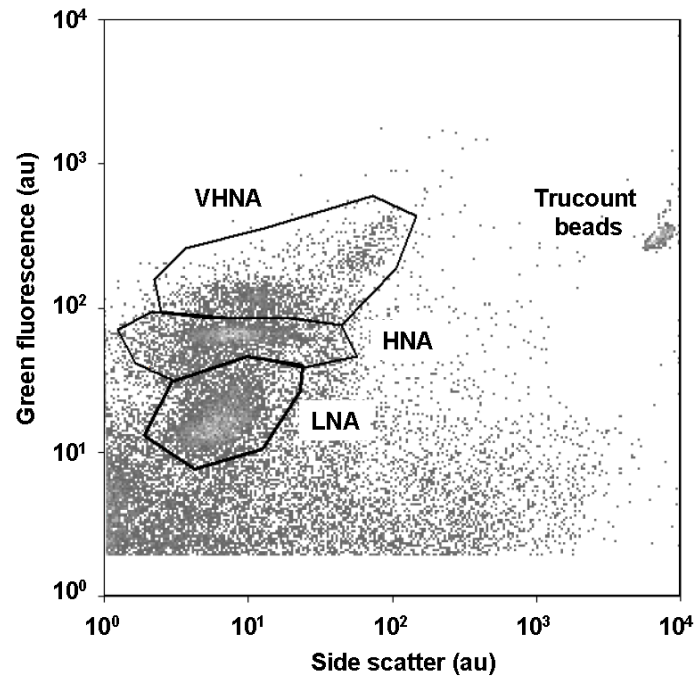

Figure S1: Example of flow cytometry analysis performed to discriminate and count the heterotrophic prokaryote assemblages during the Tokyo-Palau cruise at station 8 (25 m depth). This cytogram of green fluorescence intensity (SYBR Green II ®) versus side scatter intensity evidences three groups of heterotrophic prokaryotes with various nucleic acid contents: one defined by prokaryotes with a low nucleic acid content (LNA), one defined by prokaryotes with a high nucleic acid content (HNA) and one defined by those with a very high nucleic acid content (VHNA). Trucount calibration beads (Beckton Dickinson ®) were used both as an internal standard and to determine the volume analysed by the flow cytometer in order to perform accurate absolute counts.

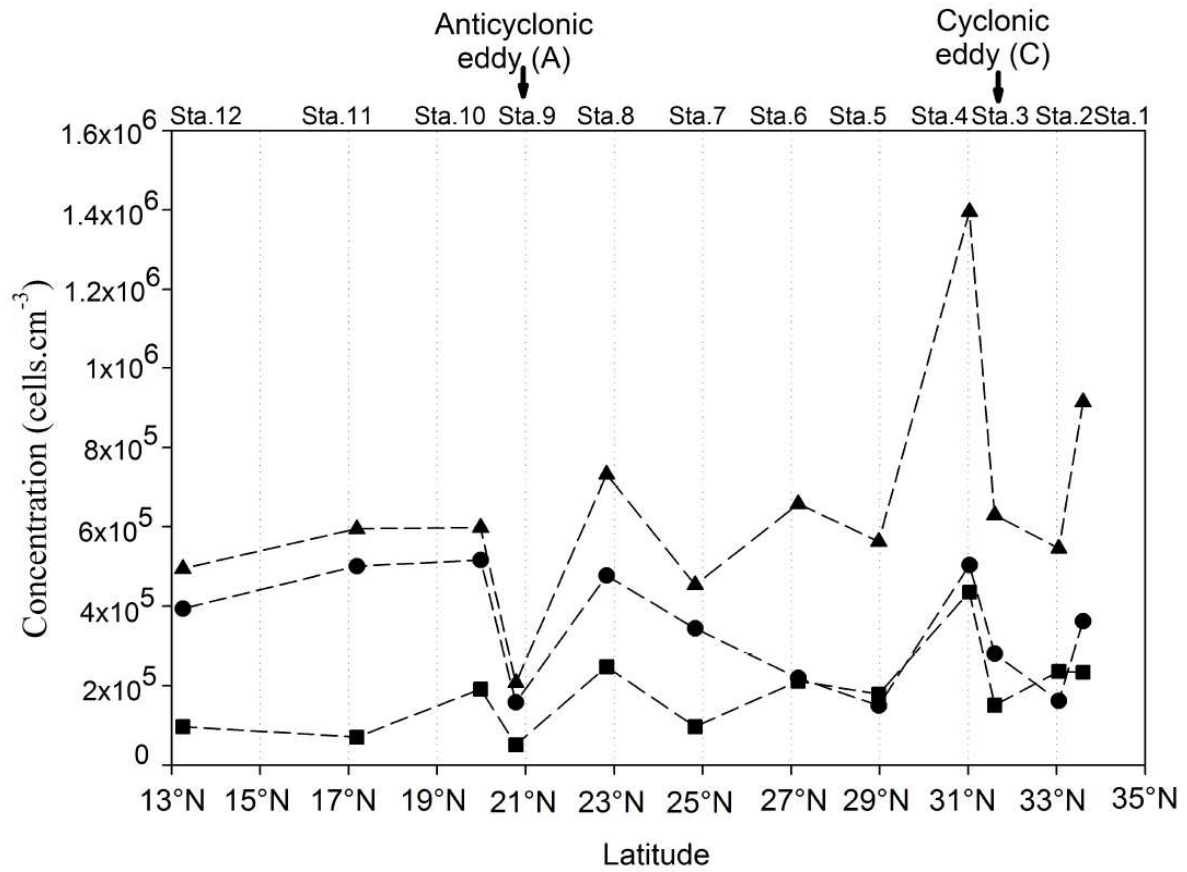

Figure S2: Latitudinal distribution of the heterotrophic prokaryote abundances at the surface along the 141.5°E meridian. (▲) is LNA heterotrophic prokaryotes, (●) the HNA heterotrophic prokaryotes and (■) the VHNA heterotrophic prokaryotes. Sampling stations are indicated on the upper scale axis.

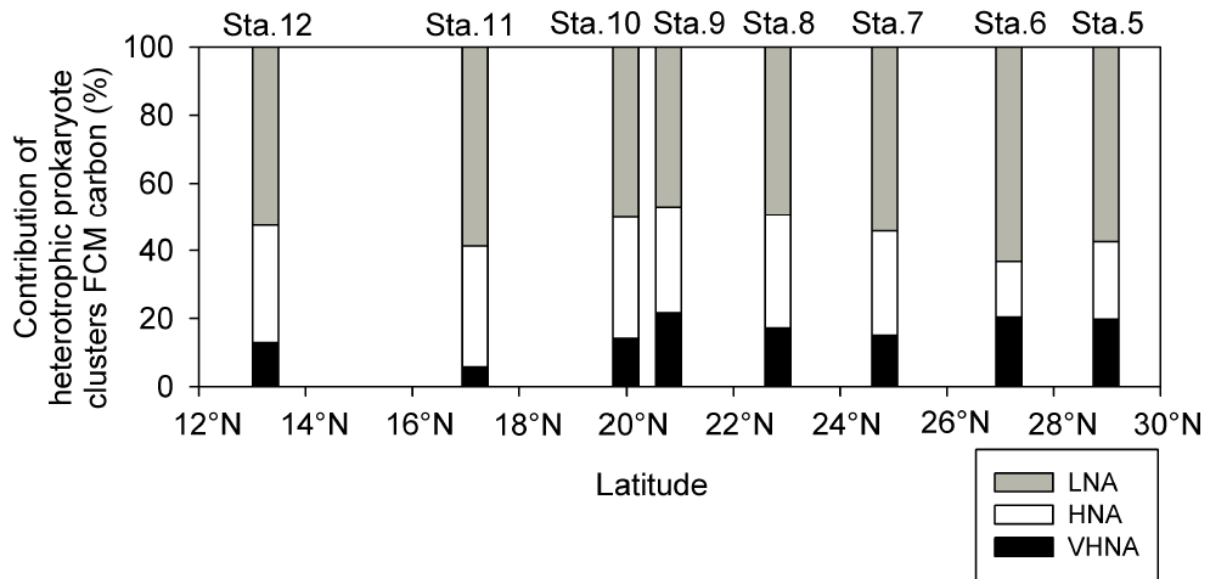

Figure S3: Latitudinal contributions (%) of each heterotrophic prokaryote cluster (LNA, HNA, VHNA) as defined by flow cytometry (FCM) to the whole heterotrophic prokaryote biomass integrated between surface and 200m depth.
